# Supplementary material for: CDKAL1 rs7756992 is associated with diabetic retinopathy in a Chinese population with type 2 diabetes
Source: PubMed Central journal article supplement (PMC5562862; doi:10.1038/s41598-017-09010-w), 2017-08-18
Supplement: 41598_2017_9010_MOESM1_ESM.pdf [file 41598_2017_9010_MOESM1_ESM.pdf]

**CDKAL1 rs7756992 is associated with diabetic retinopathy in a Chinese population with type 2 diabetes**

Danfeng Peng<sup>1+</sup>, Jie Wang<sup>1+</sup>, Rong Zhang<sup>1</sup>, Feng Jiang<sup>1</sup>, Claudia HT Tam<sup>2</sup>, Guozhi Jiang<sup>2</sup>, Tao Wang<sup>1</sup>, Miao Chen<sup>1</sup>, Jing Yan<sup>1</sup>, Shiyun Wang<sup>1</sup>, Dandan Yan<sup>1</sup>, Zhen He<sup>1</sup>, Ronald CW Ma<sup>2</sup>, Yuqian Bao<sup>1</sup>, Cheng Hu<sup>1,3\*</sup> & Weiping Jia<sup>1\*</sup>

Supplementary Table 1 Distributions of SNPs among stage 1 samples

| Chr. | SNP        | Gene         | Minor/major allele | Minor allele frequency |         |                        |       |
|------|------------|--------------|--------------------|------------------------|---------|------------------------|-------|
|      |            |              |                    | Case-control study (1) |         | Case-control study (2) |       |
|      |            |              |                    | Controls               | DR only | DN only                | DR&DN |
| 1    | rs2641348  | ADAM30       | C/T                | 0.038                  | 0.040   | 0.033                  | 0.031 |
| 1    | rs10923931 | NOTCH2       | T/G                | 0.040                  | 0.040   | 0.034                  | 0.032 |
| 1    | rs340874   | PROX1        | G/A                | 0.393                  | 0.440   | 0.378                  | 0.377 |
| 2    | rs7578597  | THADA        | C/T                | 0.007                  | 0.005   | 0.006                  | 0.008 |
| 2    | rs243021   | LOC105374756 | C/T                | 0.328                  | 0.315   | 0.312                  | 0.310 |
| 2    | rs7593730  | RBMS1        | T/C                | 0.145                  | 0.133   | 0.151                  | 0.152 |
| 2    | rs3923113  | GRB14        | G/T                | 0.110                  | 0.094   | 0.108                  | 0.144 |
| 2    | rs13389219 | LOC101929615 | T/C                | 0.079                  | 0.078   | 0.081                  | 0.097 |
| 2    | rs16856187 | G6PC2        | C/A                | 0.274                  | 0.242   | 0.282                  | 0.252 |
| 2    | rs7578326  | LOC646736    | G/A                | 0.147                  | 0.138   | 0.158                  | 0.131 |
| 2    | rs2943641  | LOC646736    | T/C                | 0.051                  | 0.072   | 0.053                  | 0.065 |
| 3    | rs1801282  | PPARG        | G/C                | 0.045                  | 0.054   | 0.032                  | 0.059 |
| 3    | rs7612463  | UBE2E2       | A/C                | 0.195                  | 0.196   | 0.200                  | 0.185 |
| 3    | rs831571   | PSMD6        | T/C                | 0.359                  | 0.351   | 0.356                  | 0.370 |
| 3    | rs4607103  | ADAMTS9-AS2  | T/C                | 0.418                  | 0.354   | 0.383                  | 0.358 |
| 3    | rs4402960  | IGF2BP2      | T/G                | 0.258                  | 0.278   | 0.278                  | 0.262 |
| 3    | rs7651090  | IGF2BP2      | G/A                | 0.258                  | 0.283   | 0.283                  | 0.261 |
| 3    | rs16861329 | ST6GAL1      | T/C                | 0.186                  | 0.198   | 0.170                  | 0.167 |
| 4    | rs6815464  | MAEA         | G/C                | 0.421                  | 0.413   | 0.390                  | 0.381 |
| 4    | rs10010131 | WFS1         | A/G                | 0.037                  | 0.062   | 0.043                  | 0.051 |
| 5    | rs459193   | C5orf67      | T/C                | 0.426                  | 0.409   | 0.438                  | 0.451 |
| 5    | rs4457053  | ZBED3-AS1    | G/A                | 0.053                  | 0.051   | 0.049                  | 0.048 |
| 6    | rs7756992  | CDKAL1       | A/G                | 0.475                  | 0.428   | 0.499                  | 0.414 |
| 6    | rs9470794  | ZFAND3       | C/T                | 0.306                  | 0.328   | 0.314                  | 0.340 |
| 6    | rs1535500  | KCNK16       | T/G                | 0.434                  | 0.466   | 0.459                  | 0.495 |
| 7    | rs2191349  | GTF3AP5      | G/T                | 0.316                  | 0.355   | 0.350                  | 0.348 |
| 7    | rs864745   | JAZF1        | G/A                | 0.208                  | 0.204   | 0.223                  | 0.224 |
| 7    | rs1799884  | GCK          | A/G                | 0.223                  | 0.280   | 0.225                  | 0.224 |

Supplementary Table 1 (Continued) Distributions of SNPs among stage 1 samples

| Chr. | SNP        | Gene                  | Minor/major allele | Minor allele frequency |         |                        |       |
|------|------------|-----------------------|--------------------|------------------------|---------|------------------------|-------|
|      |            |                       |                    | Case-control study (1) |         | Case-control study (2) |       |
|      |            |                       |                    | Controls               | DR only | DN only                | DR&DN |
| 7    | rs917793   | <i>YKT6</i>           | A/T                | 0.227                  | 0.271   | 0.218                  | 0.220 |
| 7    | rs6467136  | <i>LOC105375490</i>   | A/G                | 0.183                  | 0.175   | 0.203                  | 0.165 |
| 7    | rs10229583 | <i>PAX4</i>           | A/G                | 0.138                  | 0.152   | 0.173                  | 0.167 |
| 7    | rs791595   | <i>LOC101928423</i>   | A/G                | 0.156                  | 0.163   | 0.132                  | 0.158 |
| 7    | rs972283   | <i>LOC105375508</i>   | A/G                | 0.246                  | 0.257   | 0.295                  | 0.265 |
| 8    | rs516946   | <i>ANK1</i>           | A/G                | 0.084                  | 0.109   | 0.101                  | 0.112 |
| 8    | rs515071   | <i>ANK1</i>           | T/C                | 0.122                  | 0.163   | 0.150                  | 0.143 |
| 8    | rs896854   | <i>TP53INP1</i>       | A/G                | 0.338                  | 0.307   | 0.314                  | 0.306 |
| 8    | rs13266634 | <i>SLC30A8</i>        | T/C                | 0.354                  | 0.352   | 0.374                  | 0.411 |
| 9    | rs7041847  | <i>GLIS3</i>          | A/G                | 0.434                  | 0.486   | 0.462                  | 0.438 |
| 9    | rs17584499 | <i>PTPRD</i>          | T/C                | 0.091                  | 0.098   | 0.095                  | 0.100 |
| 9    | rs10811661 | <i>CDKN2A/B</i>       | C/T                | 0.370                  | 0.385   | 0.410                  | 0.409 |
| 9    | rs13292136 | <i>CHCHD2P9</i>       | T/C                | 0.070                  | 0.075   | 0.094                  | 0.082 |
| 9    | rs2796441  | <i>LOC101927502</i>   | C/T                | 0.369                  | 0.458   | 0.405                  | 0.411 |
| 9    | rs11787792 | <i>GPSM1</i>          | G/A                | 0.049                  | 0.034   | 0.029                  | 0.032 |
| 10   | rs10906115 | <i>CDC123</i>         | G/A                | 0.365                  | 0.356   | 0.352                  | 0.316 |
| 10   | rs12779790 | <i>CDC123</i>         | G/A                | 0.190                  | 0.174   | 0.183                  | 0.174 |
| 10   | rs1802295  | <i>VPS26A</i>         | T/C                | 0.110                  | 0.111   | 0.099                  | 0.078 |
| 10   | rs12571751 | <i>ZMIZ1</i>          | G/A                | 0.410                  | 0.463   | 0.463                  | 0.436 |
| 10   | rs1111875  | <i>IDE-KIF11-HHEX</i> | C/T                | 0.314                  | 0.290   | 0.301                  | 0.289 |
| 10   | rs7903146  | <i>TCF7L2</i>         | T/C                | 0.041                  | 0.040   | 0.041                  | 0.047 |
| 10   | rs10886471 | <i>GRK5</i>           | T/C                | 0.217                  | 0.198   | 0.226                  | 0.185 |
| 11   | rs231362   | <i>KCNQ1</i>          | T/C                | 0.070                  | 0.101   | 0.100                  | 0.093 |
| 11   | rs2237892  | <i>KCNQ1</i>          | T/C                | 0.262                  | 0.255   | 0.284                  | 0.270 |
| 11   | rs5219     | <i>KCNJ11</i>         | T/C                | 0.434                  | 0.414   | 0.426                  | 0.408 |
| 11   | rs10751301 | <i>TENM4</i>          | C/G                | 0.230                  | 0.209   | 0.204                  | 0.209 |
| 11   | rs1387153  | <i>MTNR1B</i>         | T/C                | 0.441                  | 0.439   | 0.426                  | 0.441 |
| 12   | rs10842994 | <i>LOC105369709</i>   | T/C                | 0.181                  | 0.189   | 0.188                  | 0.161 |
| 12   | rs1531343  | <i>RPSAP52</i>        | C/G                | 0.164                  | 0.136   | 0.137                  | 0.128 |
| 12   | rs7961581  | <i>LOC105369832</i>   | C/T                | 0.175                  | 0.245   | 0.245                  | 0.203 |
| 13   | rs9552911  | <i>SGCG</i>           | A/G                | 0.240                  | 0.212   | 0.234                  | 0.244 |
| 13   | rs1359790  | <i>LOC105370275</i>   | T/C                | 0.252                  | 0.241   | 0.273                  | 0.270 |
| 15   | rs7403531  | <i>RASGRP1</i>        | T/C                | 0.366                  | 0.400   | 0.358                  | 0.418 |
| 15   | rs7172432  | <i>NPM1P47</i>        | G/A                | 0.341                  | 0.363   | 0.361                  | 0.394 |
| 15   | rs1436955  | <i>NPM1P47</i>        | A/G                | 0.217                  | 0.201   | 0.216                  | 0.244 |
| 15   | rs7178572  | <i>HMG20A</i>         | G/A                | 0.376                  | 0.384   | 0.356                  | 0.357 |
| 15   | rs7177055  | <i>LOC101929457</i>   | A/G                | 0.351                  | 0.352   | 0.349                  | 0.339 |
| 15   | rs11634397 | <i>ZFAND6</i>         | G/A                | 0.083                  | 0.095   | 0.093                  | 0.129 |
| 15   | rs2028299  | <i>AP3S2</i>          | C/A                | 0.212                  | 0.202   | 0.214                  | 0.198 |

Supplementary Table 1 (Continued) Distributions of SNPs among stage 1 samples

| Chr. | SNP        | Gene             | Minor/major allele | Minor allele frequency |         |                        |       |
|------|------------|------------------|--------------------|------------------------|---------|------------------------|-------|
|      |            |                  |                    | Case-control study (1) |         | Case-control study (2) |       |
|      |            |                  |                    | Controls               | DR only | DN only                | DR&DN |
| 15   | rs8042680  | <i>PRC1</i>      | C/A                | 0.011                  | 0.005   | 0.005                  | 0.004 |
| 16   | rs8050136  | <i>FTO</i>       | A/C                | 0.126                  | 0.141   | 0.156                  | 0.148 |
| 16   | rs7202877  | <i>CTRB1</i>     | G/T                | 0.206                  | 0.184   | 0.219                  | 0.214 |
| 16   | rs17797882 | <i>MAF</i>       | T/C                | 0.194                  | 0.218   | 0.202                  | 0.222 |
| 16   | rs16955379 | <i>CMIP</i>      | T/C                | 0.267                  | 0.257   | 0.239                  | 0.235 |
| 17   | rs391300   | <i>SRR</i>       | A/G                | 0.284                  | 0.283   | 0.326                  | 0.341 |
| 17   | rs312457   | <i>SLC16A13</i>  | C/T                | 0.120                  | 0.152   | 0.159                  | 0.161 |
| 17   | rs13342232 | <i>SLC16A11</i>  | G/A                | 0.117                  | 0.147   | 0.140                  | 0.158 |
| 17   | rs4430796  | <i>HNF1B</i>     | G/A                | 0.393                  | 0.349   | 0.296                  | 0.300 |
| 18   | rs12970134 | <i>LOC342784</i> | A/G                | 0.218                  | 0.220   | 0.212                  | 0.251 |
| 19   | rs10401969 | <i>SUGP1</i>     | C/T                | 0.080                  | 0.089   | 0.093                  | 0.090 |
| 19   | rs3786897  | <i>PEPD</i>      | G/A                | 0.415                  | 0.450   | 0.458                  | 0.455 |
| 20   | rs6017317  | <i>FITM2</i>     | G/T                | 0.494                  | 0.477   | 0.416                  | 0.476 |
| 20   | rs4812829  | <i>HNF4A</i>     | A/G                | 0.487                  | 0.458   | 0.468                  | 0.450 |
| X    | rs5945326  | <i>DUSP9</i>     | G/A                | 0.308                  | 0.350   | 0.355                  | 0.398 |

Supplementary Table 2 Distribution of rs7756992 among patients with different severities of diabetic retinopathy

|                     | n     | Genotype count 11/12/22 <sup>a</sup> | Minor allele frequency | P value for trend analysis |
|---------------------|-------|--------------------------------------|------------------------|----------------------------|
| Patients without DR | 2,199 | 608/989/488                          | 0.471                  |                            |
| Mild NPDR           | 709   | 242/323/129                          | 0.419                  |                            |
| Moderate NPDR       | 396   | 126/174/79                           | 0.438                  |                            |
| Severe NPDR         | 267   | 79/117/55                            | 0.452                  |                            |
| PDR                 | 116   | 38/53/20                             | 0.419                  | 0.96                       |

<sup>a</sup> 11, major allele homozygotes; 12, heterozygotes; 22, minor allele homozygotes

DR = diabetic retinopathy; NPDR = non-proliferative diabetic retinopathy; PDR = proliferative diabetic retinopathy.
